# Supplementary material for: Development and Characterization of Novel Microsatellite Markers for the Peach Fruit Moth Carposina sasakii (Lepidoptera: Carposinidae) Using Next-Generation Sequencing
Source: PubMed Central journal article supplement (PMC4813223; doi:10.3390/ijms17030362), 2016-03-15
Supplement: ijms-17-00362-s001.pdf [file ijms-17-00362-s001.pdf]

## Supplementary Materials: Development and Characterization of Novel Microsatellite Markers for the Peach Fruit Moth *Carposina sasakii* (Lepidoptera: Carposinidae) Using Next-Generation Sequencing

You-Zhu Wang, Li-Jun Cao, Jia-Ying Zhu and Shu-Jun Wei

**Table S1.** Annotated results for the 35 examined microsatellite loci using BLASTx and BLASTn against NCBI database.

| Locus | Gene Annotation; GenBank Accession Number                                                                                | E Value                 |
|-------|--------------------------------------------------------------------------------------------------------------------------|-------------------------|
| CS03  | Alpha2 macroglobulin isoform2 ( <i>Operophtera brumata</i> ); KOB65313.1                                                 | $6.00 \times 10^{-4}$   |
| CS07  | PREDICTED: serine/threonine-protein kinase par-1-like isoform X3 ( <i>Bombyx mori</i> ); XP_012549778.1                  | $2.00 \times 10^{-3}$   |
| CS14  | hypothetical protein ( <i>Ralstonia pickettii</i> ); WP_022534306.1                                                      | 3.20                    |
| CS19  | hypothetical protein ( <i>Ralstonia pickettii</i> ); WP_022534306.1                                                      | 3.20                    |
| CS24  | RNA-binding protein lark ( <i>Danaus plexippus</i> ); EHJ73625.1; / <i>Bombyx mori</i> mRNA,clone: fmgV18J03; AK378213.1 | $2.00 \times 10^{-142}$ |
| CS29  | PREDICTED: uncharacterized protein LOC105396690 ( <i>Plutella xylostella</i> ); XP_011566999.1                           | $3.00 \times 10^{-7}$   |
| CS32  | PREDICTED: uncharacterized protein LOC105841869 ( <i>Bombyx mori</i> ); XP_012547039.1                                   | $6.50 \times 10^{-2}$   |
| CS37  | PREDICTED: uncharacterized protein LOC106130656 ( <i>Amyelois transitella</i> ); XP_013185007.1                          | $6.00 \times 10^{-3}$   |
| CS44  | PREDICTED: bone sialoprotein-binding protein ( <i>Amyelois transitella</i> ); XP_013193275.1                             | $7.00 \times 10^{-1}$   |

Note: there is not BLAST result for the remaining loci of CS04, CS05, CS06, CS101, CS102, CS103, CS11, CS17, CS18, CS20, CS21, CS22, CS26, CS28, CS31, CS33, CS34, CS35, CS36, CS38, CS41, CS45, CS47, CS48, CS53, CS82.
